# Supplementary material
Source: publisher site journal article supplement (https://www.dovepress.com/article/445929)
Supplement: Supplementary file 1 [file get_supplementary_file.php]

**Supplementary table 1** Results of univariate and multivariate logistic regression in the

training set.

| **Variables** | **Univariate analysis** | | **Multivariate analysis** | |
| --- | --- | --- | --- | --- |
| ***OR* (95%*CI*)** | ***P*** | ***OR* (95%*CI*)** | ***P*** |
| Age | 1.037(1.025-1.05) | <0.001* | 1.059 (1.041-1.078) | <0.001* |
| Temperature | 2.109(1.535-2.916) | <0.001* | 1.399 (0.916-2.139) | 0.119 |
| Heart Rate | 1.039(1.029-1.049) | <0.001* | 1.035 (1.021-1.049) | <0.001* |
| [Respiratory Rate](javascript:;) | 1.168(1.097-1.252) | <0.001* |  |  |
| Hypertension | 1.702(1.136-2.537) | 0.009* |  |  |
| AST | 1(0.999-1.001) | 0.526 | 0.998 (0.997-1.000) | 0.121 |
| Albumin | 0.869(0.836-0.901) | <0.001* |  |  |
| Direct Bilirubin | 0.999(0.988-1.008) | 0.78 | 0.983 (0.969-0.995) | 0.014* |
| Total Cholesterol | 0.96(0.877-1.042) | 0.356 |  |  |
| Urea | 1.217(1.152-1.294) | <0.001* |  |  |
| Serum Creatinine | 1.016(1.011-1.022) | <0.001* | 1.008 (1.003-1.015) | 0.004* |
| Amylase | 1(1-1.001) | 0.002* |  |  |
| Lipase | 1(1-1.001) | 0.054 |  |  |
| Serum Sodium | 0.957(0.912-1.004) | 0.073 |  |  |
| Serum phosphorus | 0.27(0.148-0.484) | <0.001* |  |  |
| Serum Magnesium | 0.275(0.054-1.256) | 0.107 |  |  |
| Serum Calcium | 0.026(0.01-0.066) | <0.001* | 0.135 (0.042-0.411) | 0.001* |
| WBC | 1.098(1.057-1.142) | <0.001* |  |  |
| Neutrophil count | 1.069(1.045-1.095) | <0.001* |  |  |
| Lymphocytes count | 0.9(0.869-0.929) | <0.001* | 0.957 (0.918-0.994) | 0.03* |
| Monocytes count | 0.944(0.882-1.001) | 0.074 |  |  |
| Eosinophils count | 0.385(0.259-0.546) | <0.001* | 0.683 (0.437-1.002) | 0.074 |
| Basophils count | 0.896(0.676-1.143) | 0.405 |  |  |
| Red cell distribution width | 1.121(1.021-1.234) | 0.017* |  |  |
| Platelet count | 0.014(0-0.375) | 0.013* |  |  |
| Platelet distribution width | 1.106(1.005-1.224) | 0.044* |  |  |
| Mean platelet volume | 1.175(1.01-1.366) | 0.036* |  |  |
| Prothrombin time | 1.174(1.061-1.301) | 0.002* | 0.151 (0.009-1.340) | 0.148 |
| International normalized ratio | 6.18(2.025-19.02) | 0.001* | 43089 (0.017-1.003) | 0.166 |
| D-dimer | 1(1-1.001) | <0.001* | 1.000 (1.000-1.000) | 0.017* |

Abbreviation: CI, confidence interval; OR, odds ration; AST, aspartate aminotransferase; WBC, White Blood Cell Count. **P* < 0.05
